# Supplementary material
Source: publisher figshare collection journal article supplement (https://karger.figshare.com/ndownloader/files/26674811)
Supplement: Supplementary file 1 [file 26674811]

**Suppl. table 2.** Functional parameters of patients at Hemer and Greifswald

|  | All (n = 41) | Hemer (n = 24) | Greifswald (n = 17 | p value (Hemer vs. Greifswald) |
| --- | --- | --- | --- | --- |
| FEV 1 (%-pred) | 93.8 ± 17.7 | 95.4 ± 16.8 | 91.6 ± 19.13 | 0.50 |
| VC (%-pred) | 95.4 ± 17.6 | 99.5 ± 15.5 | 89.8 ± 19.2 | 0.08 |
| TLC (%-pred) | 94.1 ± 16.1 | 95.0 ± 15.3 | 92.8 ± 17.1 | 0.69 |
| RV/TLC (%-pred) | 93.8 ± 19.9 | 91.6 ± 18.2 | 96.8 ± 22.3 | 0.42 |
| TLCO (%-pred) | 37.4 ± 11.7 | 38.8 ± 12.2 | 35.1 ± 10.8 | 0.34 |
| pO2 (mmHg) | 65.1 ± 12.8 | 70.5 ± 10.8 | 56.5 ± 11.1 | <0.001 |
| pCO2 (mmHg) | 34.8 ± 3.6 | 36.0 ± 3.3 | 33.1 ± 3.2 | 0.01 |
| SaO2 (%) | 92.6 ± 4.9 | 94.5 ± 2.2 | 89.4 ± 6.3 | <0.01 |
